# Supplementary material for: GlnR Activation Induces Peroxide Resistance in Mycobacterial Biofilms
Source: PubMed Central journal article supplement (PMC6039565; doi:10.3389/fmicb.2018.01428), 2018-07-04
Supplement: Image_1.pdf [file Image_1.pdf]

A

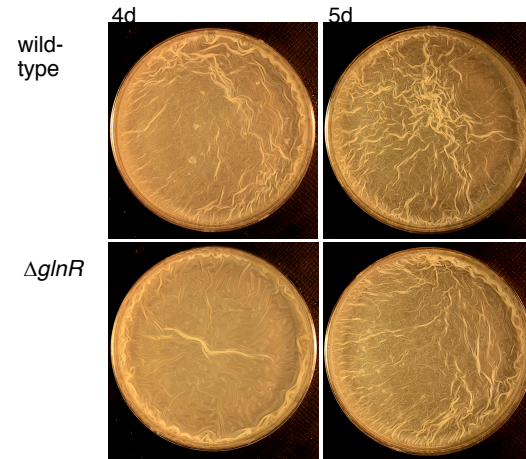

B

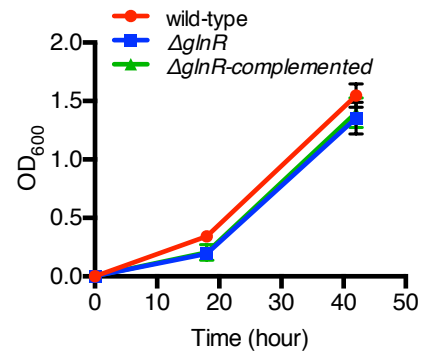

**Figure S1:** Growth of *M. smegmatis* in planktonic and biofilm cultures in modified M63 medium, referred to as biofilm medium. **A.** A top-down view of pellicle biofilms of wild-type and  $\Delta glnR$  strains in detergent-free modified M63 medium at the indicated time point. **B.** Planktonic growth of wild-type,  $\Delta glnR$  and  $\Delta glnR$ -complemented strains in modified M63 medium with 0.05% (v/v) Tween80.
