# Supplementary material for: GlnR Activation Induces Peroxide Resistance in Mycobacterial Biofilms
Source: PubMed Central journal article supplement (PMC6039565; doi:10.3389/fmicb.2018.01428), 2018-07-04
Supplement: Image_2.pdf [file Image_2.pdf]

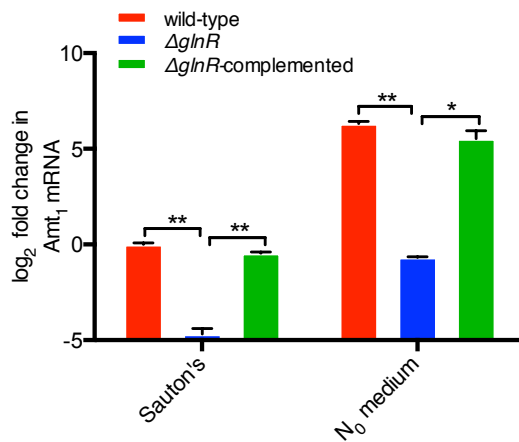

**Figure S2:** Activation of GlnR, measured by change in the transcript levels of Amt<sub>1</sub>, after three hour exposure to nitrogen-free Sauton's medium (denoted as N<sub>0</sub> medium). A ΔglnR mutant and its complemented strains were used as controls. SigA transcript level was used as endogenous reference for normalization. Data represents mean ± SD of three biologically independent experiments.
