# Supplementary material for: GlnR Activation Induces Peroxide Resistance in Mycobacterial Biofilms
Source: PubMed Central journal article supplement (PMC6039565; doi:10.3389/fmicb.2018.01428), 2018-07-04
Supplement: Image_3.pdf [file Image_3.pdf]

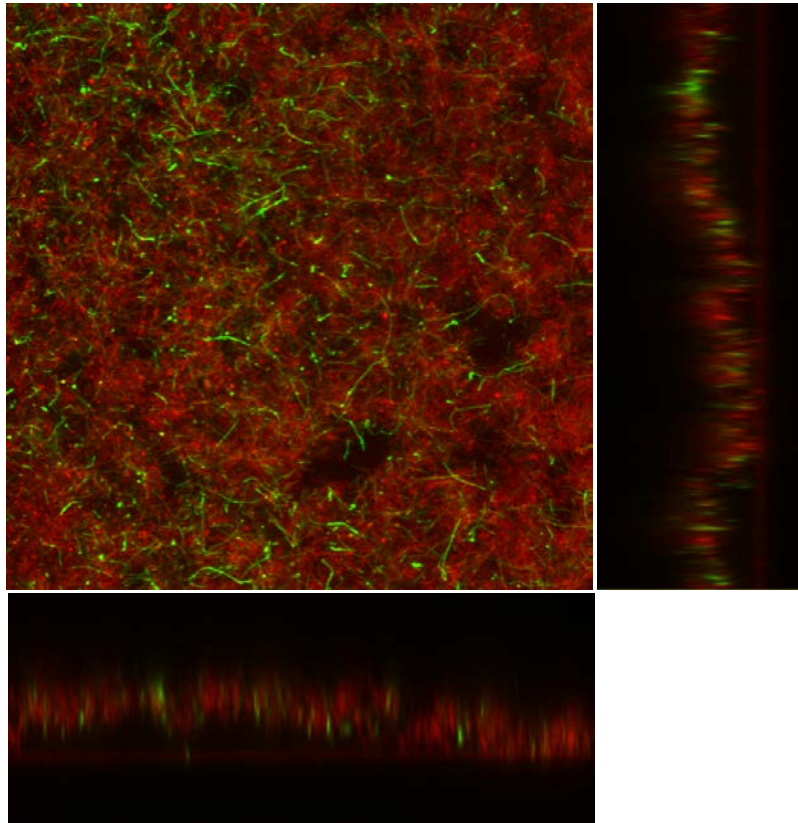

**Figure S3:** Expression of Dendra-2 (green) from the promoter of *amt<sub>1</sub>* (MSMEG\_2425) in *M. smegmatis* biofilms after 4-days of growth in microfluidic device. *M. smegmatis* cells were constitutively expressing mCherry. The image in the mainframe shows maximum intensity projection of Dendra-2 (green) and mCherry (red) signals across z-stacks of biofilms. Orthogonal projections across the z-axis of two sides are shown in the insets.
