# Supplementary material for: GlnR Activation Induces Peroxide Resistance in Mycobacterial Biofilms
Source: PubMed Central journal article supplement (PMC6039565; doi:10.3389/fmicb.2018.01428), 2018-07-04
Supplement: Image_4.pdf [file Image_4.pdf]

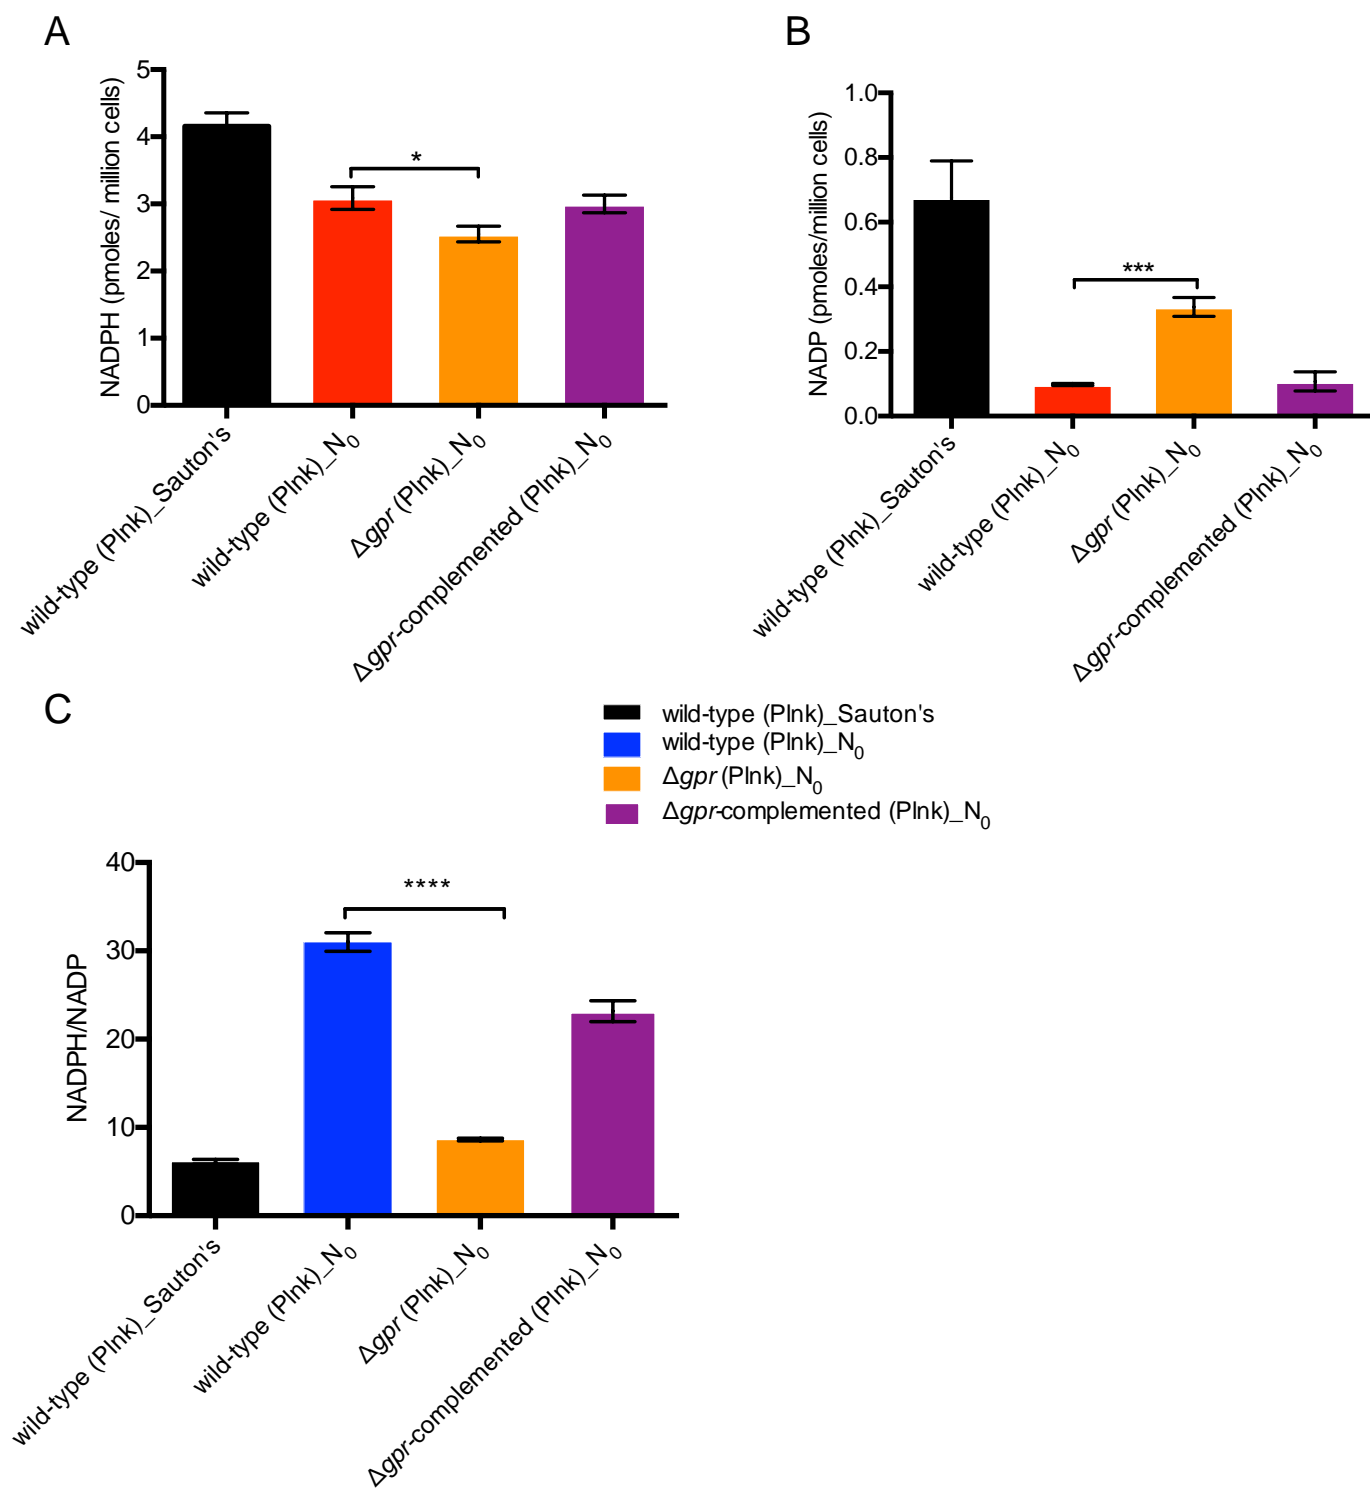

**Figure S4:** Levels of NADPH (A), NADP (B) and their ratio (C) in wild-type *M. smegmatis*, its isogenic *gpr* mutant, and its complemented derivative in nitrogen-free Sauton's medium. Value of wild-type in complete Sauton's medium was used as a reference. Data represent  $n = 3 \pm SD$ . \*\*\*\* indicates  $p < 0.0001$
