# Supplementary material for: GlnR Activation Induces Peroxide Resistance in Mycobacterial Biofilms
Source: PubMed Central journal article supplement (PMC6039565; doi:10.3389/fmicb.2018.01428), 2018-07-04
Supplement: Image_5.pdf [file Image_5.pdf]

**A**

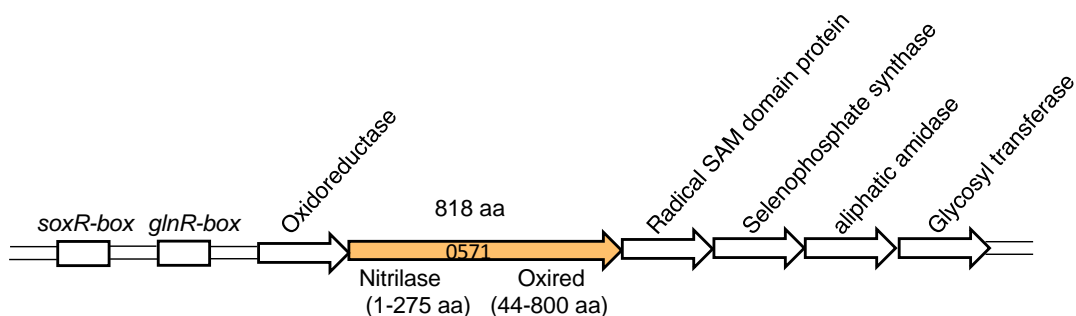

**B**

MTTLAAV SANFTRDLEQNFALIADLAEQAREKGVDFLVLPEAAIGGYLSSLG  
 NHGDTVRATSRSLPPAIRLDGPEIARVQQIVGDLVVAIGFCELADDGETRYN  
 AA AVLDRFDVYGSYRKVHQPLGEGMSYSAGSDYGVFDTPVGRVGLQICYDK  
 AFPEAARLMALGGAQIIASLSAWPAARTATAQNLQDDRWTYRFNLFDMARA  
 LDNQVFWVASNQSGSFGSLRYVGNKVVDPGGNVLATLLDSGMVAEVDI  
 DETFRTMRAGMFHLRDRRPDVYAPLTDSDGPRTAKWRELAHAUDDLRS  
 PVAGRQHPALLFPEPGDPRPSDRGNALRRRRFRGALEPSTGRGERAGTRQVR  
 LRLHLGGRDPSAHRQRRPAVQRGCGARGRRHAPRTGAVMTTHVPVAVIGG  
 GQAGLSVSWYLVVRAGIEHIVIESKTPMHAWADTRWDNFTLVTPNWHCRLPG  
 YPYAGPDPDGFMTREVDVWLAGWLDTFDPPLRNHTQVTRLQNRAGGGFE  
 VTLRDESGQSTLTCDHAVIATGGYPVPVIPSIAAQLDETILQIHSEQYRNAGT  
 LPDGAVLVVGTGQSGAQIAEDLHLAGRRVHLAVGGAPRVARFYRGRDCMT  
 WLADMGVYDRPAQQYPGGQAAIEKTNHYVTGRDGGRDVDLRQFATEGMRL  
 YGTLADGKDSTLRFEP TLAEALDHADSVYNSICSDIDAHIERNGIDAPPASRY  
 EPVWKPETETTTLDLAAAGITSIVWAIGYRPDYRWIAASAFDGAGRPMQTRG  
 ITNVAGLSFVGLPWMHTWGSGRFLGIDRDARHIAATIISYHESVLRRLAMKV

**Figure S5:** Possibility of MSMEG\_0571 in *gpr* locus as a new selenoprotein. **A.** Schematic representation of new ORFs due to incorporation of selenocysteine at the UGA codon of MSMEG\_0571, resulting in a single polypeptide of 818 amino acids, terminating at the UAG codon of original MSMEG\_0569 ORF. BLAST search of this protein identifies a nitrilase and flavin-dependent oxidoreductase (Oxired) domains at the N- and C- terminals, respectively. The position of amino acids encompassing the domains are also indicated. **B.** Sequence of the possible selenoprotein encoded by *gpr*. Selenocysteine (U) is indicated in red, while the segments of the protein that were originally parts of MSMEG\_0571 (blue) and MSMEG\_0569 (brown) are color coded. A linker (black) between the two is out of frame with the originally annotated MSMEG\_0570.
