# Supplementary material for: GlnR Activation Induces Peroxide Resistance in Mycobacterial Biofilms
Source: PubMed Central journal article supplement (PMC6039565; doi:10.3389/fmicb.2018.01428), 2018-07-04
Supplement: Table_1.pdf [file Table_1.pdf]

**Table S1:** List of plasmids used in this study.

| Name       | Remarks                                                                                                                  | References                             |
|------------|--------------------------------------------------------------------------------------------------------------------------|----------------------------------------|
| pJL37      | P <sub>hsp60</sub> -based expression vector, <i>kan<sup>r</sup></i>                                                      | (Ojha et al., 2005; Yang et al., 2017) |
| pMH94      | L5-attP-based integrative vector, <i>kan<sup>r</sup></i>                                                                 | (Ojha et al., 2005)                    |
| pYY90      | pMH94 + <i>glnR</i> @ SacI & XbaI, <i>kan<sup>r</sup></i>                                                                | This study                             |
| pYY94      | <i>P<sub>hsp60</sub></i> - <i>msmeg_0565-0572</i> + pMH94 @ XbaI                                                         | This study                             |
| pJV53-SacB | Plasmid containing inducible recombineering protein gp60 gp61 from phage Che9c and SacB cassette, <i>kan<sup>r</sup></i> | (Ojha et al., 2005)                    |
| pEM2       | <i>P<sub>hsp60</sub></i> -mCherry cloned in pMH94 @ XbaI, <i>kan<sup>r</sup></i>                                         | (Yang et al., 2017)                    |
| pYL11      | Hyg cassette+ pJL37 @ NheI & SpeI, Hyg <sup>r</sup>                                                                      | This study                             |
| pYY96      | <i>P<sub>msmeg_2425</sub></i> -Dendra2+ pYL11 @ XbaI & NheI                                                              | This study                             |
| pCre-SacB  | Plasmid carrying Cre and SacB, <i>kan<sup>r</sup></i>                                                                    | This study                             |
