# Supplementary material for: GlnR Activation Induces Peroxide Resistance in Mycobacterial Biofilms
Source: PubMed Central journal article supplement (PMC6039565; doi:10.3389/fmicb.2018.01428), 2018-07-04
Supplement: Table_2.pdf [file Table_2.pdf]

**Table S2:** List of mycobacterial strains used in this study.

| <b>Name</b>              | <b>Remarks</b>                                                                     | <b>References</b>   |
|--------------------------|------------------------------------------------------------------------------------|---------------------|
| mc <sup>2</sup> 155      | High-Frequency Transformation strain of <i>M. smegmatis</i>                        | (Ojha et al., 2005) |
| $\Delta$ MSMEG_2425-2427 | deletion of MSMEG_2425-2427 in mc <sup>2</sup> 155, <i>zeo</i> <sup>r</sup> ,      | (Yang et al., 2017) |
| $\Delta$ <i>glnR</i>     | deletion of MSMEG_5784 in mc <sup>2</sup> 155, <i>zeo</i> <sup>r</sup> ,           | This study          |
| $\Delta$ <i>glnRcomp</i> | $\Delta$ <i>glnR</i> with pYY90, <i>zeo</i> <sup>r</sup> , <i>kan</i> <sup>r</sup> | This study          |
| $\Delta$ <i>gpr</i>      | deletion of MSMEG_0565-0572 in mc <sup>2</sup> 155, <i>zeo</i> <sup>r</sup> ,      | This study          |
| $\Delta$ <i>gprcomp</i>  | $\Delta$ <i>gpr</i> with pYY94, <i>zeo</i> <sup>r</sup> , <i>kan</i> <sup>r</sup>  | This study          |
| $\Delta$ <i>soxR</i>     | deletion of MSMEG_5450 in mc <sup>2</sup> 155, <i>zeo</i> <sup>r</sup> ,           | This study          |
| $\Delta$ <i>soxRcomp</i> | Recombineering MSMEG_5450 in $\Delta$ <i>soxR</i> , <i>zeo</i> <sup>r</sup> ,      | This study          |
