# Supplementary material for: GlnR Activation Induces Peroxide Resistance in Mycobacterial Biofilms
Source: PubMed Central journal article supplement (PMC6039565; doi:10.3389/fmicb.2018.01428), 2018-07-04
Supplement: Table_3.pdf [file Table_3.pdf]

**Table S3:** List of oligonucleotides used in this study.

| <b>Name</b>      | <b>Sequence</b>                                | <b>Remarks</b>                                  |
|------------------|------------------------------------------------|-------------------------------------------------|
| Smeg5784KoA      | GCGTAGATGGCTGCTCCGAAATCGGT                     | For isogenic deletion of <i>MSMEG_glnR</i>      |
| Smeg5784KoB      | TGGTGAGGGAGATGAGGTCTGAAGAGCAGTAGATCCA<br>ACAAG | For isogenic deletion of <i>MSMEG_glnR</i>      |
| Smeg5784KoC      | GTTGAGGTGTGAGGTGTGCTGAAGCCAGTCAGTGACC<br>TCCAC | For isogenic deletion of <i>MSMEG_glnR</i>      |
| Smeg5784KoD      | CGGATGCACGACGAGTTCGGCCAT                       | For isogenic deletion of <i>MSMEG_glnR</i>      |
| Smeg0565-0572KoA | GTTTCGCGGCGGTTTACCGCCTCTG                      | For isogenic deletion of <i>MSMEG_0565-0572</i> |
| Smeg0565-0572KoB | TGGTGAGGGAGATGAGGTCTGAAGGTGATGGATTCGT<br>CGAAC | For isogenic deletion of <i>MSMEG_0565-0572</i> |
| Smeg0565-0572KoC | GTTGAGGTGTGAGGTGTGCTGAAGCACACTCCGCACA<br>CAGGA | For isogenic deletion of <i>MSMEG_0565-0572</i> |
| Smeg0565-0572KoD | AGGCCGAACAGAATCGTCATGACG                       | For isogenic deletion of <i>MSMEG_0565-0572</i> |
| Smeg5450KoA      | TGAGCAGATCCGCCACCAGCAGCA                       | For isogenic deletion of <i>Msmeg_5450</i>      |
| Smeg5450KoB      | TGGTGAGGGAGATGAGGTCTGAAGTCAGTTCGTGCAT<br>GTCCA | For isogenic deletion of <i>Msmeg_5450</i>      |
| Smeg5450KoC      | GTTGAGGTGTGAGGTGTGCTGAAGCGCACGCCTCTGA<br>CACAT | For isogenic deletion of <i>Msmeg_5450</i>      |
| Smeg5450KoD      | GCGCGGGCTCATCGACCAGATTGT                       | For isogenic deletion of <i>Msmeg_5450</i>      |
| Smeg5450KiA      | TTCGAGTGTGCGCAGATGCGCCGA                       | For <i>Msmeg_5450comp</i>                       |
| Smeg5450KiB      | TGGTGAGGGAGATGAGGTCTGAAGCACGCAACAACGA<br>CGCCC | For <i>Msmeg_5450comp</i>                       |
| Smeg5450KiC      | GTTGAGGTGTGAGGTGTGCTGAAGGCGTCAGGCGTTT<br>GAGTT | For <i>Msmeg_5450comp</i>                       |
| Smeg5450KiD      | GAGCCTTGCACCGCCAGCTCCATG                       | For <i>Msmeg_5450comp</i>                       |
| glnRcompF        | CCAGCAGGTCGTCTAGACCCATGTAGCGGCCGACAT           | For plasmid pYY90                               |
| glnRcompR        | CGTGAGCCC GGAATTCCACTCGGTGGAGGTCACT            | For plasmid pYY90                               |
| Smeg_0572F       | TCCCTGGAGAGACATATGCCGTTGACGAATCC               | For plasmid pYY94                               |
| Smeg_0572-65IR1  | CGCACCAGGTACCAGCTGACCGACAGGCCG                 | For plasmid pYY94(PuvII)                        |

|                  |                                      |                          |
|------------------|--------------------------------------|--------------------------|
| Smeg_0572-65IF2  | CGGCCTGTCGGTCAGCTGGTACCTGGTGCG       | For plasmid pYY94(PuvII) |
| Smeg_0572-65IR2  | GGCACCCGCGACGAGCTCATCGGGGTTCTC       | For plasmid pYY94(SacI)  |
| Smeg_0572-65IF3  | GAGAACCCCGATGAGCTCGTCGCGGGTGCC       | For plasmid pYY94(SacI)  |
| Smeg_0572-65IR3  | GGGATGGTCGACGAATTCGACGAGACGGAC       | For plasmid pYY94(EcoRI) |
| Smeg_0572-65IF4  | GTCCGTCTCGTCGAATTCGTCGACCATCCC       | For plasmid pYY94(EcoRI) |
| Smeg_0565R       | CCGTGATGGCTAGCAGCGATCGAGGCGAT        | For plasmid pYY94        |
| Smeg2425F        | TCTTAGCCCTACCTGACGAA                 | For qPCR                 |
| Smeg2425R        | AAAGTCCGCCGTAGAAGAAC                 | For qPCR                 |
| P2425F           | CGTTCGAGCCTCTAGAGTTCGTCGACGCACTGCT   | For plasmid pYY96        |
| P2425R           | AGGTAGGGCTAAGGATCCTTTGTGTGAACCTCCTTG | For plasmid pYY96        |
| SmegSigA Forward | AAGGCGTCCGGCGACTTCGTGT               | For qPCR                 |
| SmegSigA Reverse | TCCACCTCTTCTTCGGCGTTGAGC             | For qPCR                 |
| Smeg0572F        | TCCATCACCGAGAACATCAAG                | For qPCR                 |
| Smeg0572R        | AATAGCTTTCGCCGTCCTC                  | For qPCR                 |
| Smeg0571F        | GACCTGGAACAGAATTTCCGC                | For qPCR                 |
| Smeg0571R        | GATTGCCAGTGACGAGAG                   | For qPCR                 |
| Smeg0570F        | TGCCTGAGATGACCTTCG                   | For qPCR                 |
| Smeg0570R        | GTCAGATGGTCGTGGATCAC                 | For qPCR                 |
| Smeg0569F        | CTGGGACAACTTCACTCTCG                 | For qPCR                 |
| Smeg0569R        | CTCGTCACGGGTCATGAAG                  | For qPCR                 |
| Smeg0568F        | CGCTTCTATGACCTCACGAC                 | For qPCR                 |
| Smeg0568R        | ATTCCTCGATGGTGCAGAAC                 | For qPCR                 |
| Smeg0567F        | ACGTCAGCACACCATCAC                   | For qPCR                 |
| Smeg0567R        | ATGAGAAACGGTGCGGTAG                  | For qPCR                 |
| Smeg0566F        | AATCTGCGTTTCCTCGGG                   | For qPCR                 |
| Smeg0566R        | TGATCTCGGCATGAACATCG                 | For qPCR                 |
| Smeg0565F        | TGGCGTTGCTGACCTATTC                  | For qPCR                 |
| Smeg0565R        | CGGGATTGATCTCACGGAAG                 | For qPCR                 |
